# Supplementary material
Source: publisher site journal article supplement (https://www.spandidos-publications.com/8505/downloadSupplementary)
Supplement: Supplementary file 1 [file downloadSupplementary]

## Sheet: Table SII
Table SII. Information for studies exluded in the meta-analysis.
Sex	Age	Del/dup	Band	Location	Version	IGF1R gene involved	r(15)	Size, Mb	SGA/LGA	Growth retardation/short stature/overgrowth	Cardiac malformation	Intellectual disability	Microcephaly	Facial abnormality	Speech development delay	Hand/foot/skeleton malformation	Café au lait spots	Other features	First author	Year
M	NA	Del	15q26.3/5p15.33p13.3	99829402-102400037	GRCh37	NO	NO	2.5/30	NA	Short stature	-	Neurodevelopmental delay	-	Malar flattening, depressed nasal bridge, sparse and arched eyebrows, convergent strabismus, downslanting palpebral fissures, retrognathia and high palate, downturned corners of the mouth	NA	Tapering fingers, brachydactyly with fifth finger clinodactyly, absent fourth finger distal interphalangeal creases	NA	Obesity	Bellucco	2020
F	NA	Del	15q26.3/5p15.33p13.3	99829402-102400037		NO	NO	2.5/30	NA	Short stature	-	Neurodevelopmental delay	-	Convergent strabismus, ocular hypertelorism, low-set ears, short neck, downturned corners of the mouth,hypermetropia and convergent strabismus	NA	Downslanting palpebral fissures, retrognathia, brachydactyly, and fifth finger clinodactyly	-	Obesity	Bellucco	2020
M	NA	Del	15q26.3/5p15.33p13.3	99829402-102400037		NO	NO	2.5/30	NA	Short stature	NA	Neurodevelopmental delay	NA	NA	NA	Small hands, brachydactyly	NA	Obesity	Bellucco	2020
M	7	Del	15q26.3/7q34-q36.3	98,085,693-101,991,189		YES	NO	3.9/18.82	-	Short stature	-	Moderate ID	Microcephaly	Abnormal facial appearance with depressed nasal bridge, squint, hypertelorism, low set ear	Delayed	-	-	-	Rahman	2019
M	4	Del	15q26.3/7q34-q36.3	98,085,693-101,991,189		YES	NO	3.9/18.82	-	Short stature	-	ID	Microcephaly	Low philtrum, squint, inverted v‐shaped thin upper lip	Severely impaired language	-	-	-	Rahman	2019
F	NA	Del/dup	15q26.3/15q11.2	101,373,740-102,383,473	GRCh37	NO	YES	1/2.6	SGA	Failure to thrive	ASD/VSD	NA	Microcephaly	Micrognathia, flat nasal bridge, epicanthal folds, hypertelorism, prominent philtrum, high arched palate	+	Syndactyly of 2 or 3 toes	Multiple	Seizure, attention deficit hyperactivity disorder	Szabo	2018
NA	NA	Del/dup	15q/15q	95258000-ter/93502000-951228000		YES	YES	5/2	SGA	+	NA	Slightly retarded psychomotor development	+	Triangular face	NA	Abnormal hand ossification with an additional phalanx on the third finger	+	-	Rossi	2008
F	NA	Del/dup	15q26.3del/10p15.3 dup	98042820-101810992/102265-1077996	GRCh38/hg20	YES	NO	3.341/0.976	-1.8 SD	Short stature	NA	ASD	Microcephaly	Triangular face, broad nasal bridge, short neck	Global developmental delay	Brachydactyly with index fingers containing only two phalanges, talipes equinovarus and overlapping first and second toes	-	Obesity	O'Riordan	2017
F	NA	Del/dup	15q26.2-26.3/15q24.3q26.2	98097301-102383473/77836339-98060906	GRCh37	YES	NO	4.3/20.2	SGA	Failure to thrive	NA	Global developmental delay, autism and behavioural difficulties	Microcephaly	Mild hypertelorism, a high-arched palate, a low posterior hairline	Global developmental delay	Small hands and feet	-	Tanner 3 breast and pubic hair development, seizure, primary ovarian failure	O'Riordan	2017
M	6	Del/dup	15q26.2q26.3/4q35.1q35.2	98,434,315-99,459,796	GRCh37	YES	NO	4.09	IUGR/SGA	Short stature	-	low range	Microcephaly	Mild frontal bossing, low-set ears	Low range	Marked clinodactyly of fifth digits	-	-	Mahmoud	2017
F	Infant	Del/dup	15q26.1/2q37.1	89,878,067-100,168,718/233,849,533-242,690,037	GRCh37	YES	NO	10/8.84	IUGR	Growth delay	-	/	Microcephaly	Broad and flat nasal bridge, micrognathia, low-set ears	/	Fifth finger clinodactyly, clubfeet	-	Congenital diaphragmatic hernia, polycystic kidney, left kidney pyelectasis	Kammoun	2017
M	23	Del/dup	15q26.2qter/18q23	97,505,284-102,465,355	hg19	YES	NO	4.96/0.57	NA	Short stature	NA	+	55 cm	NA	+	Short neck, small puffy hands and feet	NA	Obesity, sleep disorder	Dello Russo	2016
F	5	Del	46.XX,del(15)t(15:16)(q26.1:q22.3)	NA		NO	NO	NA	-	Height-5.4	Multiple VSD	Moderate developmental delay	-	Craniofacial deformity	/	Limb deformity	-	Tracheotomy for congenital subglottic stenosis	Ho and Clayton	2015
F	26	Del/dup	15q26.3/21q22.3	99 403 439-99 443 615		YES	NO	40kb/18 kb	NA	-	-	Impaired	-	-	NA	-	-	-	Witsch	2013
M	Fetus	Del/dup	15q26.2-qter/21q22.1	NA		YES	NO	NA	NA	+	-	+	+	Oblique eye fissures, epicanthic folds, flat nasal bridge, high arched palate, furrowed tongue, small dysmorphic ear	+	Short and broad hands, clinodactyly fifth finger, transverse palmar crease	NA	Hypotonia	Nadal	1997
F	Infant	Del/dup	15q26.2-qter/2q	NA		YES	NO	7.8/7.2	+	/	Atrial septal defect, ventricular septal defect, hypoplastic aorta and persistent ductus arteriosus	/	NA	Slightly coarse facies, broad nose with a flat nasal bridge and hypertelorism	/	Hypoplastic toenails	NA	CDH	Klaassens	2007
M	NA	Del/dup	15q26.1-qter/8	NA		YES	NO	NA	IUGR	/	Hypoplastic left heart,Ventricular septal defect	/	NA	Prominent forehead, flat nasal bridge, anteverted nares, low-set and dysplastic ears, retromicrognathia	/	Talipes/rockerbottom feet	NA	CDH, pulmonary hypoplasia, single umbilical artery, nail hypoplasia	Slavotinek	2006
M	Fetus (termination of pregnancy)	Del/dup	15q26.1-qter/13q34-qter	/		YES	NO	NA	IUGR	/	-	/	NA	Low-set ears	/	NA	NA	Hypoplasia of the diaphragm, single umbilical artery	Nagai	2002
F	Infant (died)	Del	15q25-q26.2	/		YES	NO	NA	IUGR/SGA	/	Dextrocardia,eft ventricular disproportion	/	NA	+	/	Rockerbottom feet, short hands and feet, clino- and brachydactyly of the fifth finger on both hands	NA	Left-sided CDH with marked mediastinal shift, lung hypoplasia, hypoplastic kidney	Schlembach	2001
F	20M	Del	46,XX, del(15)(pter-q24::q26-qter) q25del 26-qter	/		YES	NO	NA	+	/	-	Developmental delay	Microcephaly	Almond-shaped, upwards slanting eyes with hypertelorism, depressed nasal bridge and prominent philtrum with carp-shaped mouth	/	NA	NA	Mild hypotonia	Verma	1997
M	Infant	Del/dup	15q26.1-qter/3q26.33	/		YES	NO	5.7/22.5	+	/	+	/	-	+	/	+	-	Kidney defect	Maria	2011
F	Fetus (terminal)	Del/del	15q26.1-qter/18q21.3-qter	/		YES	NO	NA	+	/	NA	/	+	NA	/	+	NA	Bilateral absent kidneys, absence of spleen, with a small accessory spleen	Froster	2000
M	Fetus (terminal)	Del/dup	15q26.1-ter/2p21-ter	/		YES	NO	NA	+	/	NA	/	NA	+	/	+	NA	-	Hahm	1999
F	Fetus (terminal)	Del/dup	15q26.1-qter/8q24.1-qter	/		YES	NO	NA	+	/	+	/	NA	+	/	+	NA	Congenital diaphragmatic hernia with stomach, small intestines and spleen herniated into the thoracic cavity, hypoplastic lung; horseshoe kidney with renal hypoplasia	Chen	1998
M	5	del	15q11.2-q12 del 467kb/15q26.1 del 53kb	92,667,023-92,720,522	GRCh37/hg19	NO	NO	467kb/53kb	- 2.4 SD	-	NA	severe intellectual disability	-	NA	NA	NA	NA	Seizure	Kuroda	2014
M	2	del	15q11.2-q12 del 467kb/15q26.1 del 53kb	92,667,023-92,720,522	GRCh37/hg19	NO	NO	467kb/53kb	- 2.2 SD	-	NA	severe intellectual disability	-	NA	NA	NA	NA	.	Kuroda	2014
F	3M	NA	15q26.2-qter/21q11.2-21 qter	NA		YES	NO	NA	P10	NA	atrioventricular septal defect,VSD,PDA	/	-	frontal bossing, flat face, upslanting palpebral fissures, protrud- ing tongue, short neck with excess skin	/	Brachydactyly, clinodactyly of the fifth fingers with a single interdigital crease on the right side and overlapping toes	NA	.	M. R. Baruffi	2013
NA	fetus(termination of pregnancy)	del/dup	15q26qter/2p16.3p25.3	95.715.936-100.168.859	hg18	YES	NO	4.45	NA	/	tetralogy of Fallot	/	NA	high forehead, hypertelorism, narrow mouth and sub- mucous cleft palate and low-set dysplastic ears	/	brachycephaly,clubfeet, some overrid- ing toes and fingers and left hand camptodactyly	NA	left-sided diaphragmatic herniawith herniation of the stomach and a part of the liver and gut, lung hypoplasia,nephromegaly and gonadic dysge- nesis were observed. Neuropathologic findings revealed Arnold-Chiari malformation related to the lumbosacra meningocele	A. L. Mosca	2011
F	6.9	del	15q26.2-26.3/10p15.3-p12.31 dup/10q11.21 dup	NA		YES		NA	+	+	PDA	+	+	-	NA	-	-	urolithiasis	Y. Kawashima-Sonoyama	2024
M	2.7	del	46,XY,der(15)t(7;15)(q35;q26.2)	NA		YES		NA	+	+	VSD	+	-	-	NA	+	-	Inguinal hernia	Y. Kawashima-Sonoyama	2024
